# Supplementary material for: NMR-Based Tissular and Developmental Metabolomics of Tomato Fruit
Source: MDPI journal article supplement (doi:10.3390/metabo9050093), 2019-05-09
Supplement: s1 [file s1]

**Supplementary Figure S2: Compositional distances between sample means per tomato fruit tissue and stage of development based on the absolute contents in 39 metabolites and starch.** Euclidian distance calculated using mean centred and unit-variance scaled data of five tissues and four stages of development. In bold, distances lower than 0.5 between sample means per tissue and stage mapped in figure 5.

*Article Title: NMR-based tissular and developmental metabolomics of tomato fruit. Authors: Lemaire-Chamley M., Mounet F., Deborde C., Maucourt M., Jacob D., Moing A.*

| Exocarp |              |              |        | Pericarp     |              |              |        | Columella    |              |              |              | Locular tissue |              |        |        | Seeds        |              |              |              |        |                |
|---------|--------------|--------------|--------|--------------|--------------|--------------|--------|--------------|--------------|--------------|--------------|----------------|--------------|--------|--------|--------------|--------------|--------------|--------------|--------|----------------|
| 12DPA   | 20 DPA       | 35 DPA       | 45 DPA | 12 DPA       | 20 DPA       | 35 DPA       | 45 DPA | 12 DPA       | 20 DPA       | 35 DPA       | 45 DPA       | 12 DPA         | 20 DPA       | 35 DPA | 45 DPA | 12 DPA       | 20 DPA       | 35 DPA       | 45 DPA       |        |                |
|         | <b>0.251</b> | <b>0.394</b> | 0.598  | <b>0.498</b> | 0.654        | 0.585        | 0.888  | 0.567        | 0.652        | 0.647        | 0.861        | 0.617          | 0.516        | 0.781  | 0.808  | <b>0.476</b> | <b>0.459</b> | 0.518        | 0.659        | 12 DPA | Exocarp        |
|         |              | <b>0.393</b> | 0.600  | 0.584        | 0.666        | 0.602        | 0.904  | 0.611        | 0.653        | 0.681        | 0.910        | 0.755          | 0.588        | 0.829  | 0.863  | 0.624        | 0.513        | 0.526        | 0.641        | 20 DPA |                |
|         |              |              | 0.520  | 0.679        | 0.758        | 0.514        | 0.897  | 0.637        | 0.685        | 0.597        | 0.880        | 0.790          | 0.613        | 0.787  | 0.837  | 0.594        | 0.500        | <b>0.328</b> | 0.536        | 35 DPA |                |
|         |              |              |        | 0.809        | 0.905        | 0.718        | 0.680  | 0.710        | 0.772        | 0.707        | 0.707        | 0.870          | 0.709        | 0.838  | 0.809  | 0.662        | 0.583        | <b>0.483</b> | 0.535        | 45 DPA |                |
|         |              |              |        |              | <b>0.352</b> | 0.555        | 0.803  | <b>0.382</b> | <b>0.490</b> | 0.669        | 0.868        | 0.587          | 0.536        | 0.853  | 0.848  | 0.663        | 0.555        | 0.765        | 0.913        | 12 DPA | Pericarp       |
|         |              |              |        |              |              | <b>0.483</b> | 0.806  | <b>0.425</b> | <b>0.420</b> | 0.671        | 0.900        | 0.671          | 0.547        | 0.863  | 0.880  | 0.789        | 0.664        | 0.870        | 1.000        | 20 DPA |                |
|         |              |              |        |              |              |              | 0.717  | <b>0.478</b> | <b>0.489</b> | <b>0.419</b> | 0.747        | 0.686          | 0.518        | 0.689  | 0.735  | 0.713        | 0.620        | 0.670        | 0.823        | 35 DPA |                |
|         |              |              |        |              |              |              |        | 0.747        | 0.782        | 0.824        | <b>0.456</b> | 0.914          | 0.783        | 0.881  | 0.732  | 0.947        | 0.832        | 0.943        | 0.992        | 45 DPA |                |
|         |              |              |        |              |              |              |        |              | <b>0.224</b> | <b>0.452</b> | 0.758        | 0.564          | <b>0.402</b> | 0.696  | 0.748  | 0.592        | <b>0.475</b> | 0.639        | 0.798        | 12 DPA | Columella      |
|         |              |              |        |              |              |              |        |              |              | <b>0.449</b> | 0.813        | 0.676          | <b>0.454</b> | 0.702  | 0.785  | 0.713        | 0.577        | 0.694        | 0.842        | 20 DPA |                |
|         |              |              |        |              |              |              |        |              |              |              | 0.722        | 0.663          | <b>0.489</b> | 0.540  | 0.725  | 0.651        | 0.573        | 0.587        | 0.756        | 35 DPA |                |
|         |              |              |        |              |              |              |        |              |              |              |              | 0.861          | 0.761        | 0.778  | 0.567  | 0.866        | 0.807        | 0.890        | 0.946        | 45 DPA |                |
|         |              |              |        |              |              |              |        |              |              |              |              |                | <b>0.369</b> | 0.707  | 0.826  | <b>0.425</b> | 0.582        | 0.817        | 0.975        | 12 DPA | Locular tissue |
|         |              |              |        |              |              |              |        |              |              |              |              |                |              | 0.507  | 0.691  | <b>0.436</b> | <b>0.418</b> | 0.616        | 0.784        | 20 DPA |                |
|         |              |              |        |              |              |              |        |              |              |              |              |                |              |        | 0.606  | 0.746        | 0.708        | 0.733        | 0.880        | 35 DPA |                |
|         |              |              |        |              |              |              |        |              |              |              |              |                |              |        |        | 0.833        | 0.784        | 0.838        | 0.928        | 45 DPA |                |
|         |              |              |        |              |              |              |        |              |              |              |              |                |              |        |        |              | <b>0.416</b> | 0.563        | 0.736        | 12 DPA | Seeds          |
|         |              |              |        |              |              |              |        |              |              |              |              |                |              |        |        |              |              | <b>0.414</b> | 0.614        | 20 DPA |                |
|         |              |              |        |              |              |              |        |              |              |              |              |                |              |        |        |              |              |              | <b>0.424</b> | 35 DPA |                |
|         |              |              |        |              |              |              |        |              |              |              |              |                |              |        |        |              |              |              |              | 45 DPA |                |
